# Supplementary material
Source: Springer Nature journal article supplement (https://www.springermedizin.de/resource/supplementary/12960_2013_395_MOESM1_ESM.pdf/9570176)

# Related-Samples Cochran's Q Test

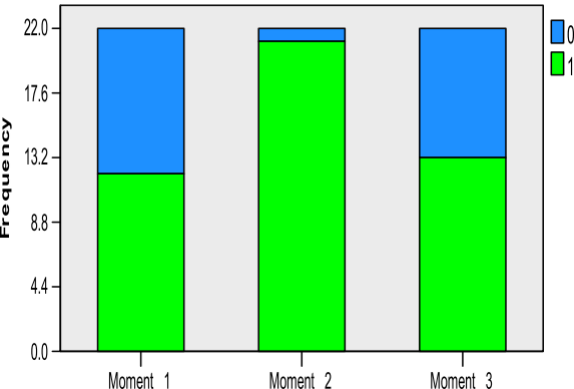

Supplement: MOESM1 [file 9570176]
